# Supplementary material for: Phage SPO1 Protein Gp49 Is a Novel RNA Binding Protein That Is Involved in Host Iron Metabolism
Source: MDPI journal article supplement (doi:10.3390/ijms241814318), 2023-09-20
Supplement: s1 [file s1]

**Table S1: Oligos used in the study (5'-3')**

|         |                                    |
|---------|------------------------------------|
| DNA1    | TGCTTATCAATTTGTTGCACC              |
| DNA2    | GGTGCAACAAATTGATAAGCA              |
| ssRNA   | AUGAAUAGUUAACAACGUGG               |
| pHT01_F | AAGGAGGAAGGATCCATGATTAAAGCGGCTG    |
| pHT01_R | GACGTCCCCGGGGCATTACAGATTGATCCAATGA |
| pET_F   | ATGATTAAAGCGGCTG                   |
| pET_R   | TTACAGATTGATCCAATGA                |
