# Supplementary material for: Phage SPO1 Protein Gp49 Is a Novel RNA Binding Protein That Is Involved in Host Iron Metabolism
Source: MDPI journal article supplement (doi:10.3390/ijms241814318), 2023-09-20
Supplement: s1 [file s1]

**Table S3: NMR statistics**

|                                              |                    |
|----------------------------------------------|--------------------|
| <b>NMR Distance and Dihedral Constraints</b> |                    |
| Distance constraints                         |                    |
| Total NOE                                    | 1238               |
| Intraresidue                                 | 670                |
| Interresidue                                 | 568                |
| Sequential ( $ i-j =1$ )                     | 232                |
| Short range ( $2 \leq  i-j  \leq 3$ )        | 162                |
| Medium range ( $4 \leq  i-j  \leq 5$ )       | 76                 |
| Long range ( $ i-j  > 5$ )                   | 98                 |
| Total Dihedral angle Restraints              | 310                |
| $\phi$                                       | 105                |
| $\psi$                                       | 105                |
| Total RDCs                                   | 0                  |
| <b>Structural Statistics</b>                 |                    |
| Violations (mean and SD)                     |                    |
| Distance constraints (Å)                     | $0.023 \pm 0.004$  |
| Dihedral angle constraints (°)               | $0.55 \pm 0.091$   |
| Maximum dihedral angle violation (°)         | 0.84               |
| Maximum distance constraint violation (Å)    | 0.32               |
| Deviations from idealized geometry           |                    |
| Bond length (Å)                              | $0.0015 \pm 0.000$ |
| Bond angle (°)                               | $0.333 \pm 0.005$  |
| Improper (°)                                 | $0.284 \pm 0.017$  |
| Average Pairwise rmsd (Å)                    |                    |
| Heavy                                        | $0.549 \pm 0.0429$ |
| Backbone                                     | $0.411 \pm 0.0750$ |
